# Supplementary material for: Discovery of 2-(1-(3-(4-Chloroxyphenyl)-3-oxo- propyl)pyrrolidine-3-yl)-1H-benzo[d]imidazole-4-carboxamide: A Potent Poly(ADP-ribose) Polymerase (PARP) Inhibitor for Treatment of Cancer
Source: MDPI journal article supplement (doi:10.3390/molecules24101901), 2019-05-17

136

20191127\_01 77 (1.511)

1: TOF MS ES+  
3.52e3

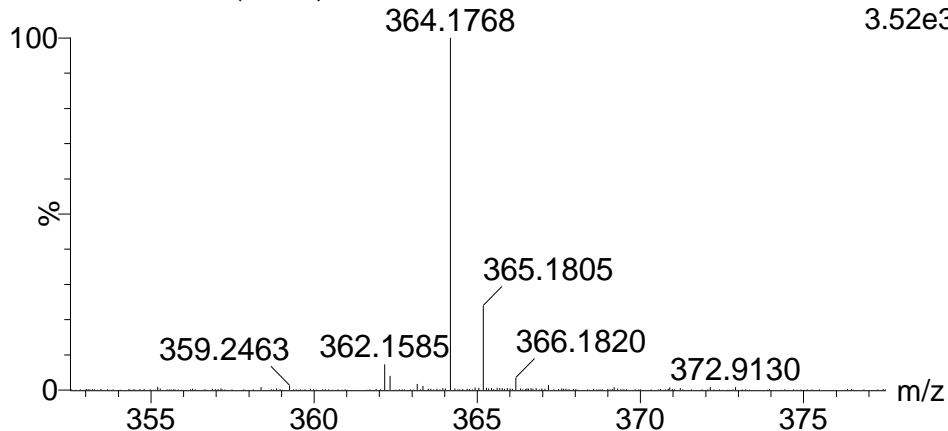

137

20191127\_02 61 (1.199)

1: TOF MS ES+  
5.05e3

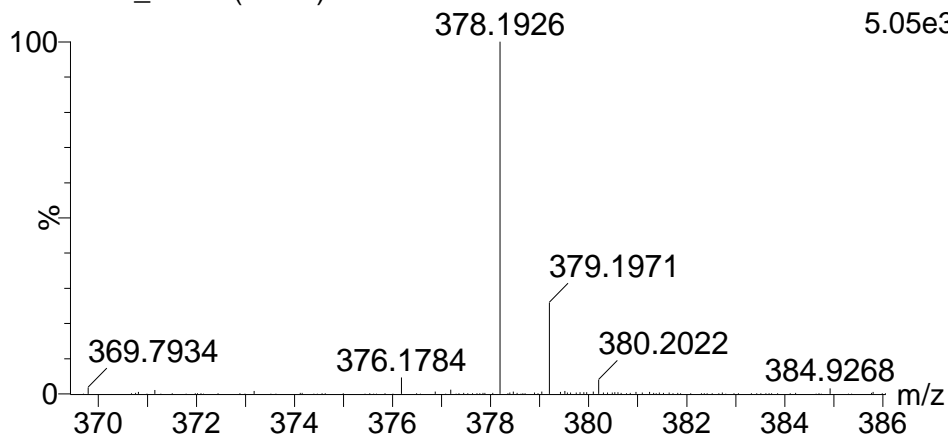

138

20191127\_03 497 (9.725)

1: TOF MS ES+  
1.74e3

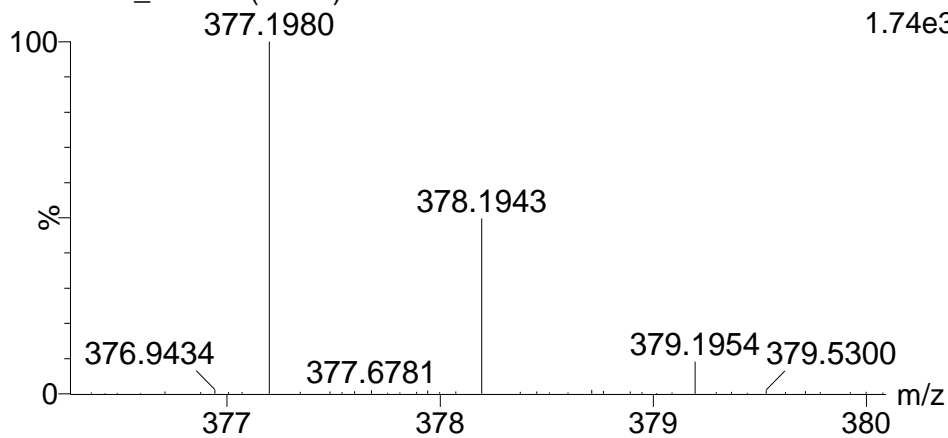

142

20191127\_04 362 (7.086)

1: TOF MS ES+  
2.53e3

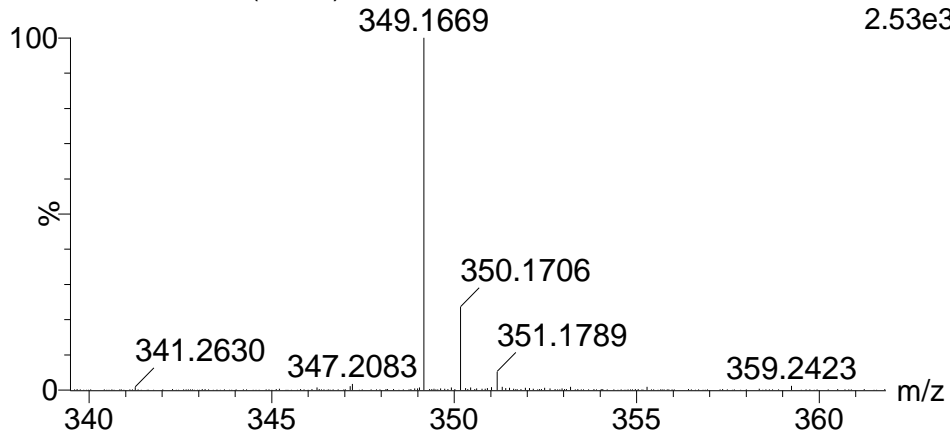

143

20191127\_05 489 (9.569)

1: TOF MS ES+  
457

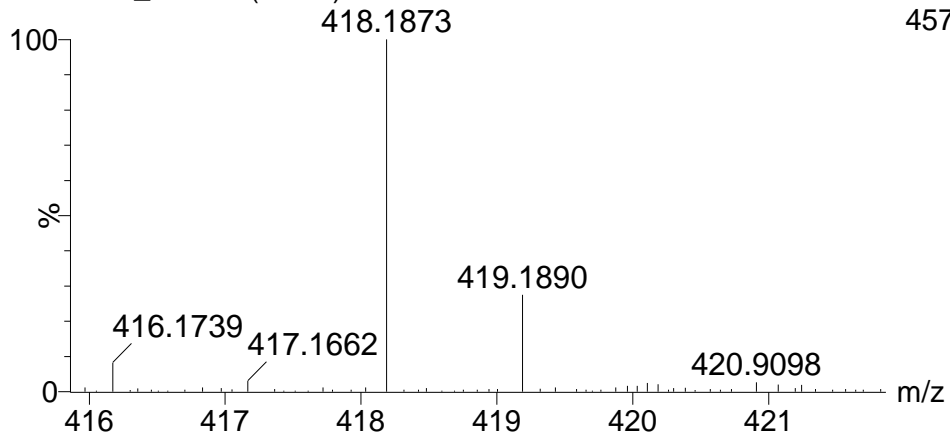

146

20191127\_06 496 (9.689)

1: TOF MS ES+  
99.2

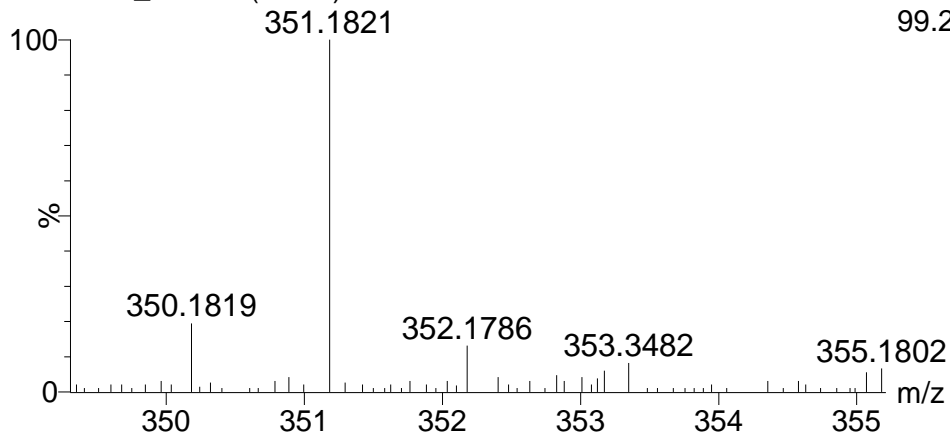

20190123\_KJ\_02 852 (3.629)

1: TOF MS ES+  
197

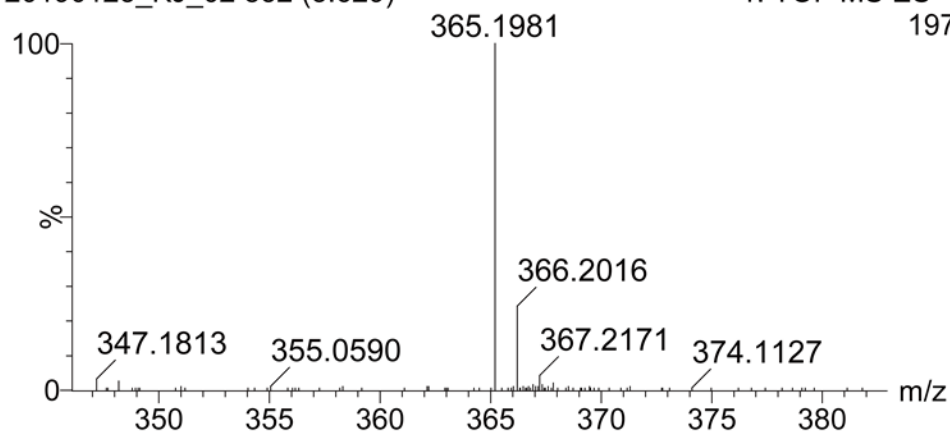

157

20191127\_08 299 (5.853)

1: TOF MS ES+  
121

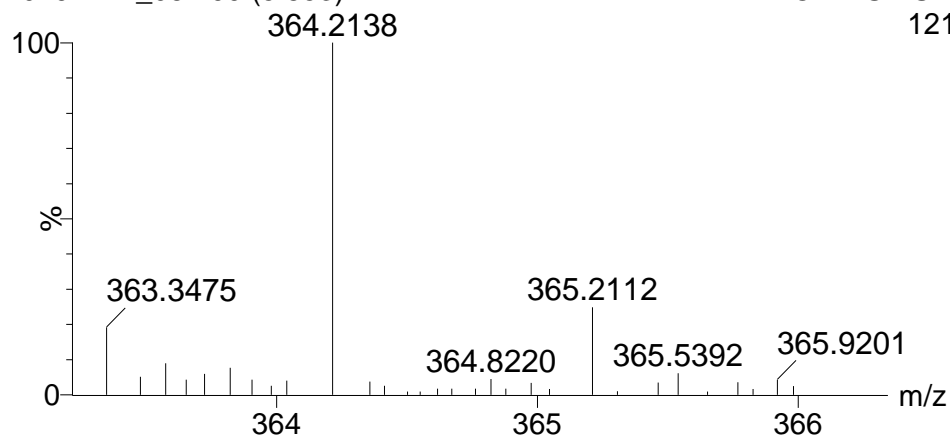

171

20191127\_09 503 (9.829)

1: TOF MS ES+  
3.30e3

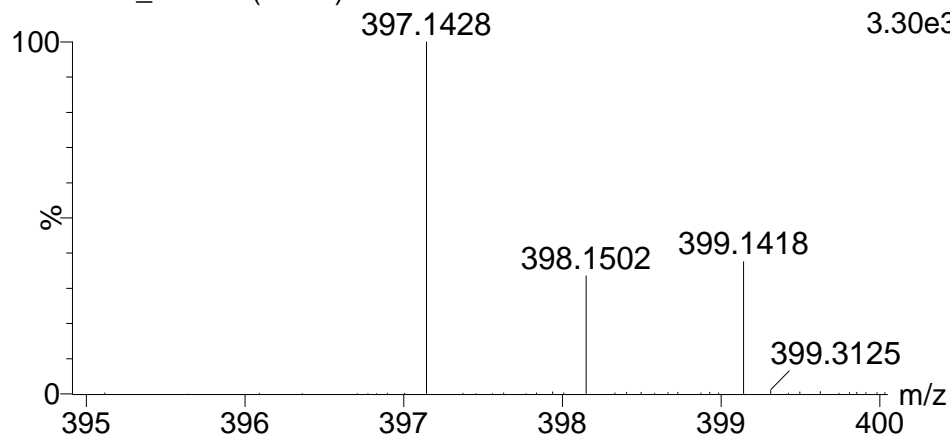

172

20191127\_10 501 (9.794)

1: TOF MS ES+  
5.75e3

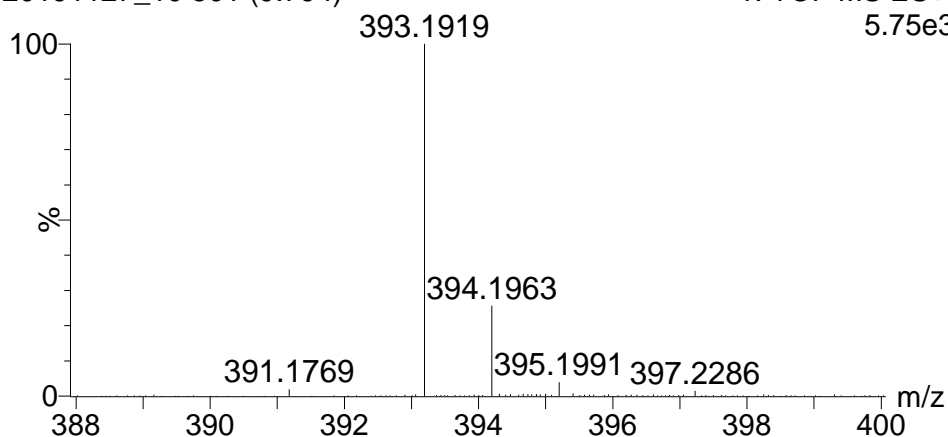

15

20191127\_11 390 (7.623)

1: TOF MS ES+  
1.71e3

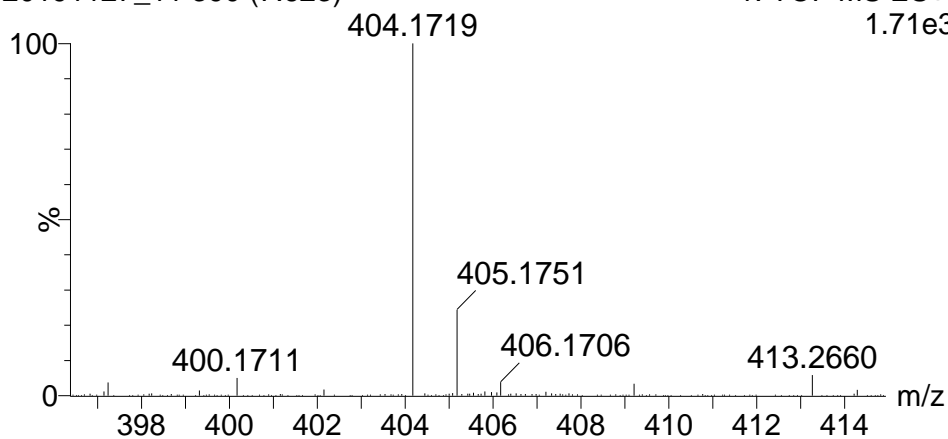

22

20191127\_12 196 (3.838)

1: TOF MS ES+  
100

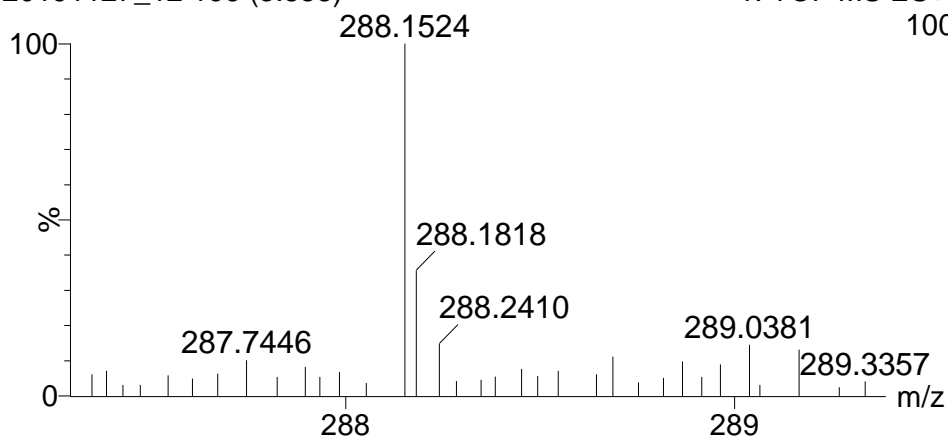

27

20191127\_13 94 (1.841)

1: TOF MS ES+  
134

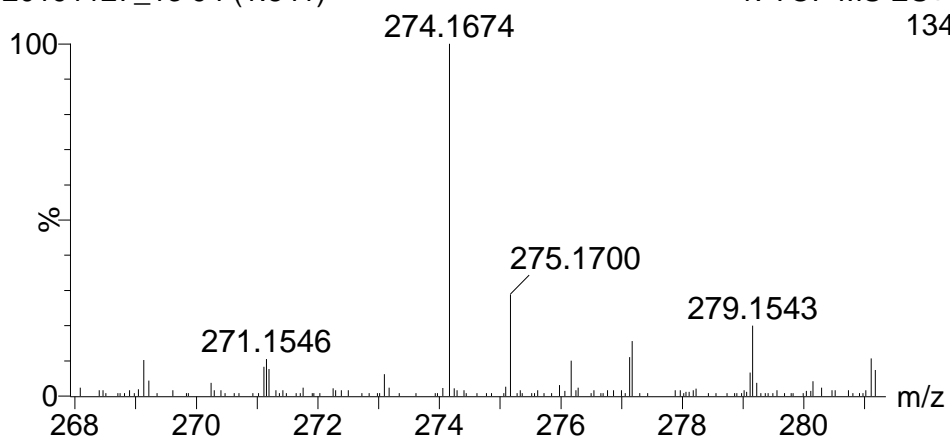

30

20191127\_14 10 (0.210)

1: TOF MS ES+  
554

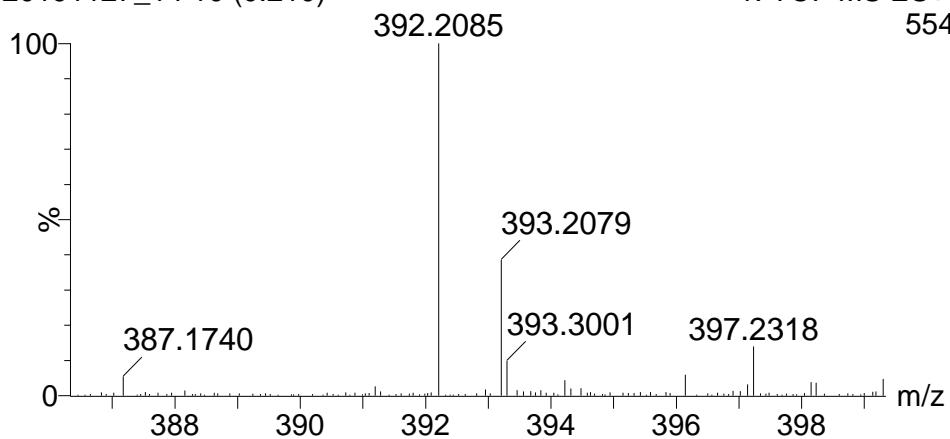

31

20191127\_15 109 (2.136)

1: TOF MS ES+  
2.62e3

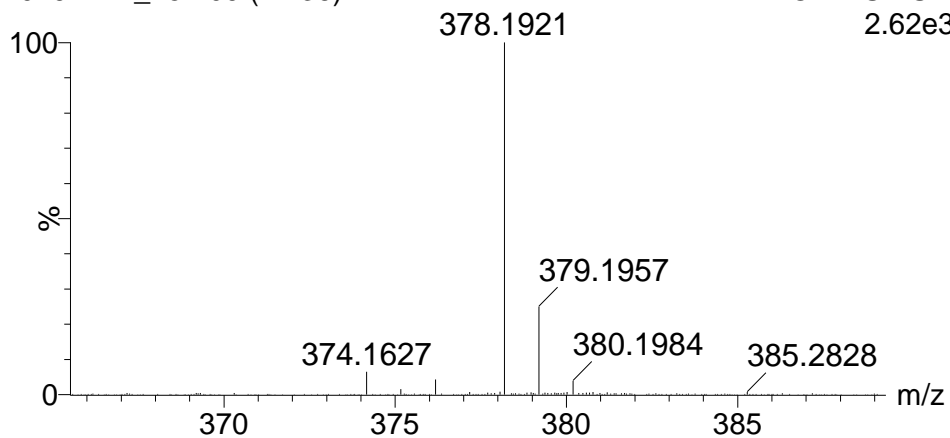

20170720\_KJ92\_+ 163 (1.657)

TOF MS ES+  
267

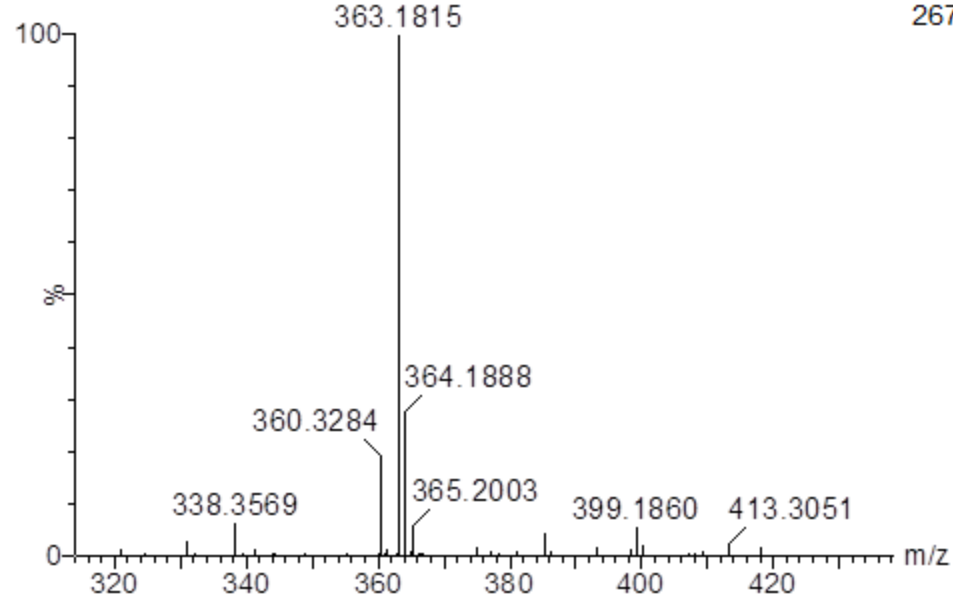

Supplement: s1 [file s1]
